# Supplementary material for: One-step fabrication of tri-metallic PdCuAu nanothorn assemblies as an efficient catalyst for oxygen reduction reaction
Source: Royal Society of Chemistry journal article supplement (doi:10.1039/c7ta10342e), 2018-01-01
Supplement: c7ta10342e1.pdf [file c7ta10342e1.pdf]

**Supporting Information for**

**One-step fabrication of tri-metallic PdCuAu nanothorn assemblies  
as an efficient catalyst for oxygen reduction reaction**

Hongjing Wang, Shuli Yin, Yinghao Li, Hongjie Yu, Chunjie Li, Kai Deng, You Xu, Xiaonian Li,

Hairong Xue,\* Liang Wang\*

College of Chemical Engineering, Zhejiang University of Technology, Hangzhou, Zhejiang 310014,  
P. R. China.

\*Corresponding authors' E-mails: xuehairong@zjut.edu.cn, wangliang@zjut.edu.cn

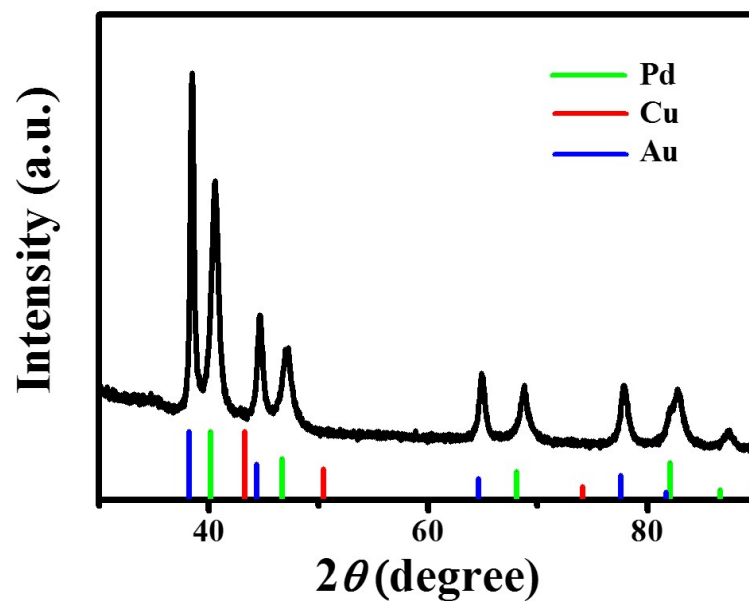

**Fig. S1** XRD pattern of PdCuAu NAs.

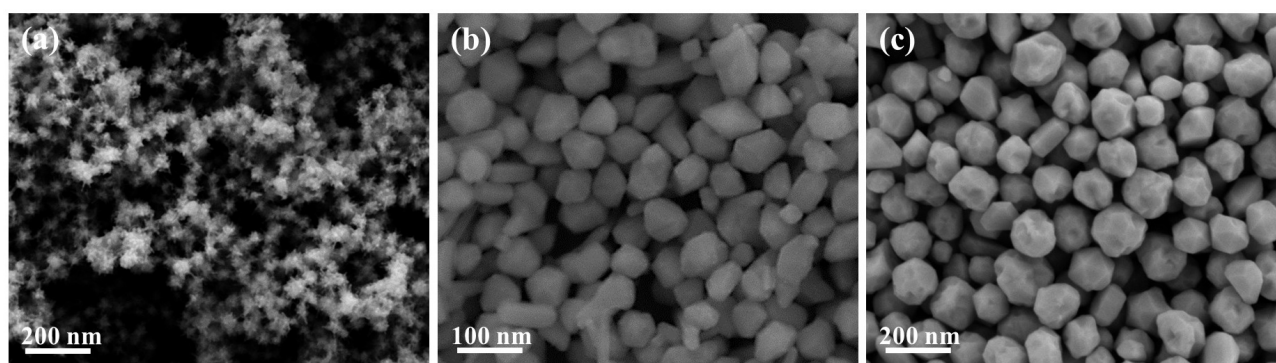

**Fig. S2** SEM images of the samples prepared under the identical conditions used for the typical synthesis. (a) Without KBr, (b) monometallic Pd, and (c) bimetallic PdAu nanoparticles.

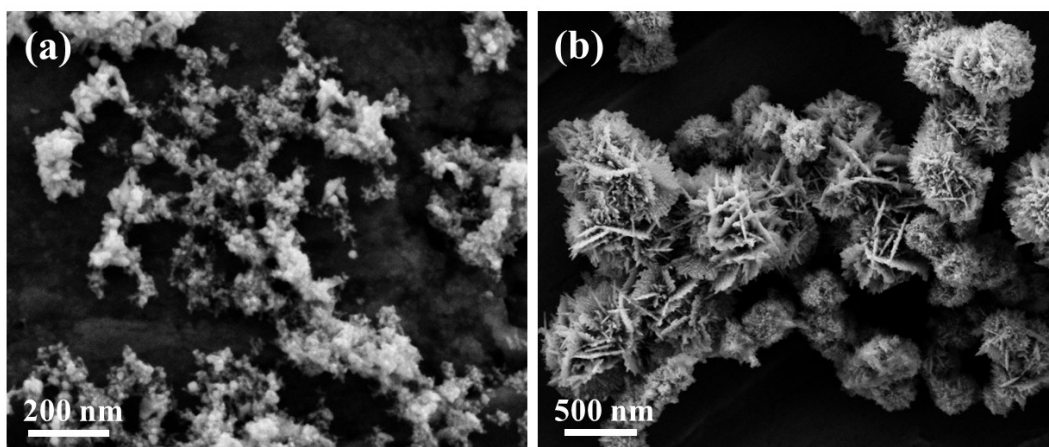

**Fig. S3** SEM images of the samples prepared without (a) HCl and (b) F127, respectively, under the identical conditions used for the typical synthesis.

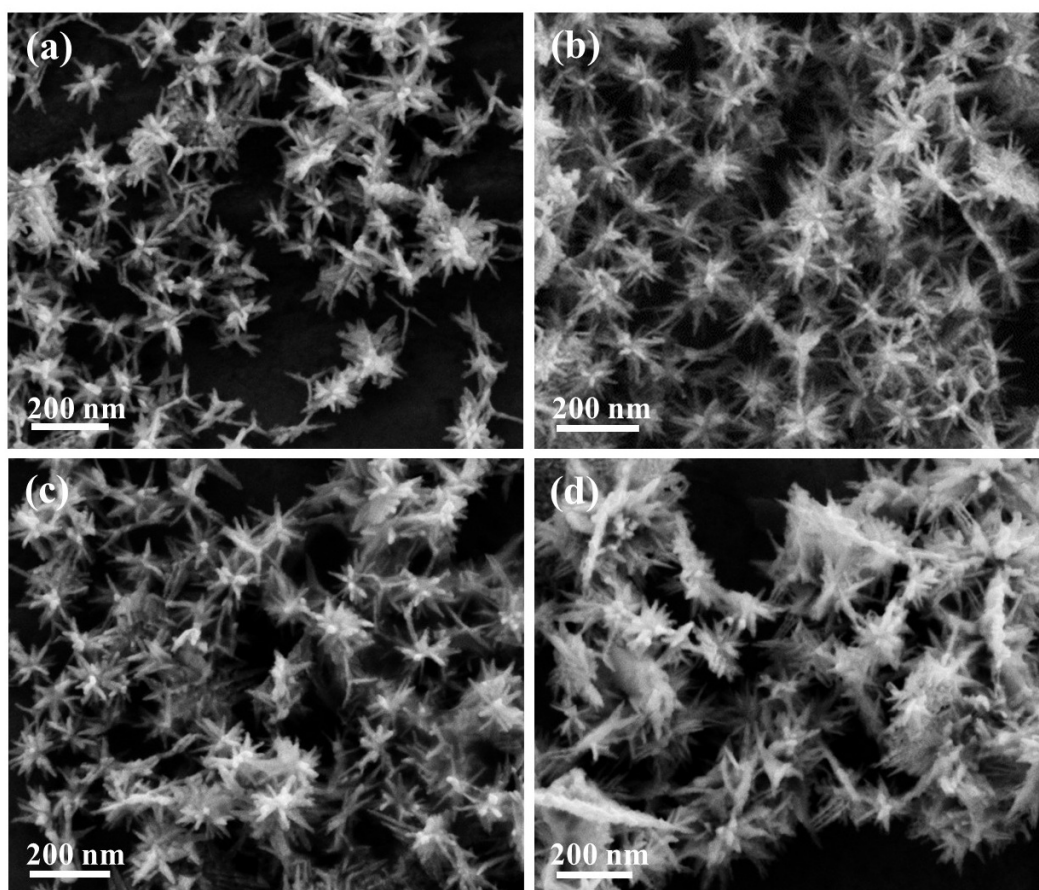

**Fig. S4** SEM images of the samples prepared into different reaction times during the typical synthesis. (a) 15 min, (b) 30 min, (c) 60 min and (d) 90 min.

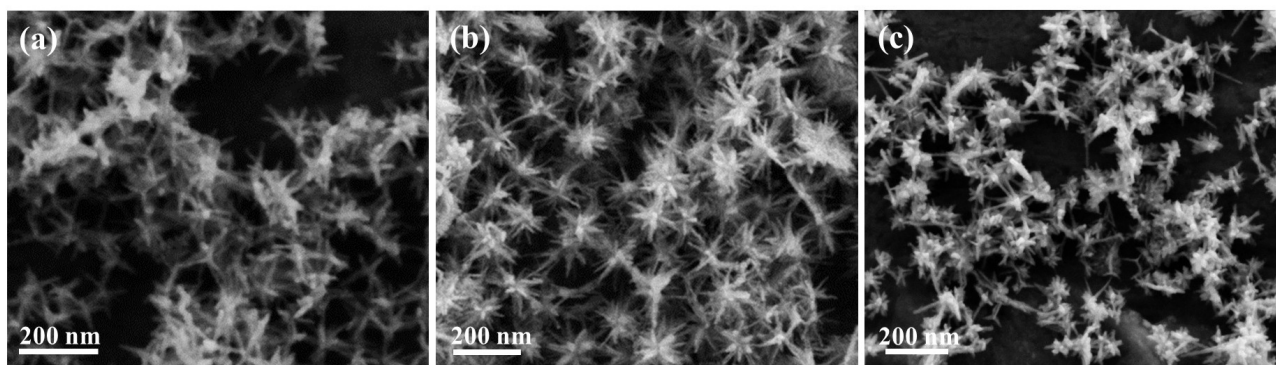

**Fig. S5** SEM images of the PdCuAu samples prepared with different metallic precursor amounts under the identical conditions used for the typical synthesis. (a) 1.5 mL of 20 mM  $\text{Na}_2\text{PdCl}_4$ , 1.5 mL of 20 mM  $\text{CuCl}_2$ , 1.5 mL of 20 mM  $\text{HAuCl}_4$ ; (b) 2.5 mL of 20 mM  $\text{Na}_2\text{PdCl}_4$ , 1.0 mL of 20 mM  $\text{CuCl}_2$ , 1.0 mL of 20 mM  $\text{HAuCl}_4$ ; (c) 3.0 mL of 20 mM  $\text{Na}_2\text{PdCl}_4$ , 0.75 mL of 20 mM  $\text{CuCl}_2$ , 0.75 mL of 20 mM  $\text{HAuCl}_4$ .

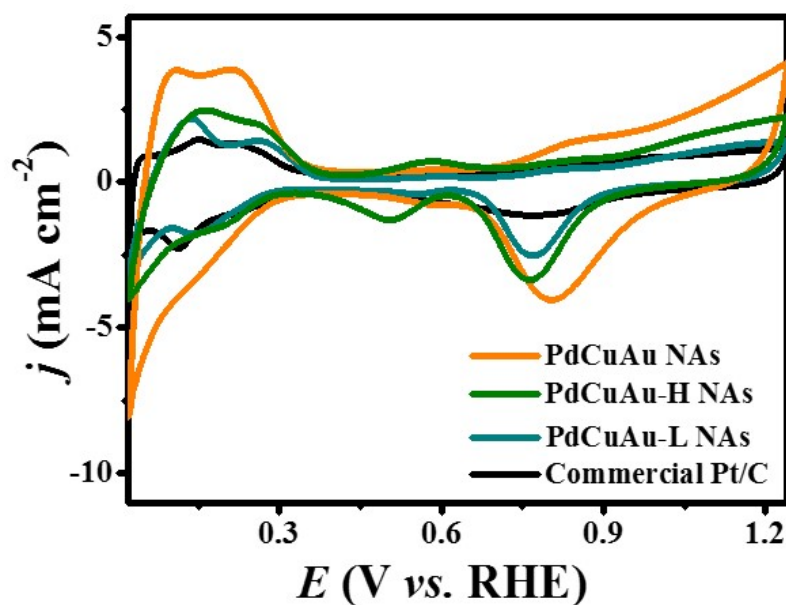

**Fig. S6** CV curves of the PdCuAu NAs with different compositions and commercial Pt/C.

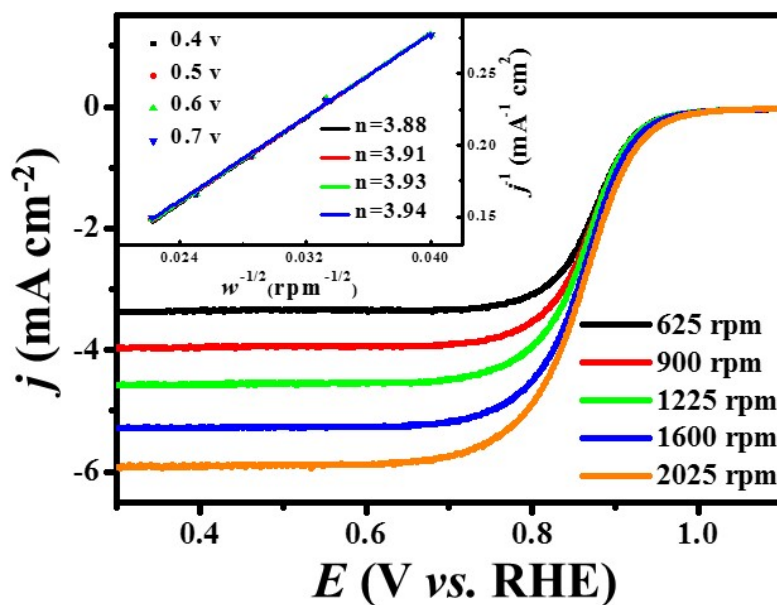

**Fig. S7** ORR polarization curves of commercial Pt/C at different RDE rotation rates, the inset shows the electron transfer number at different potentials.

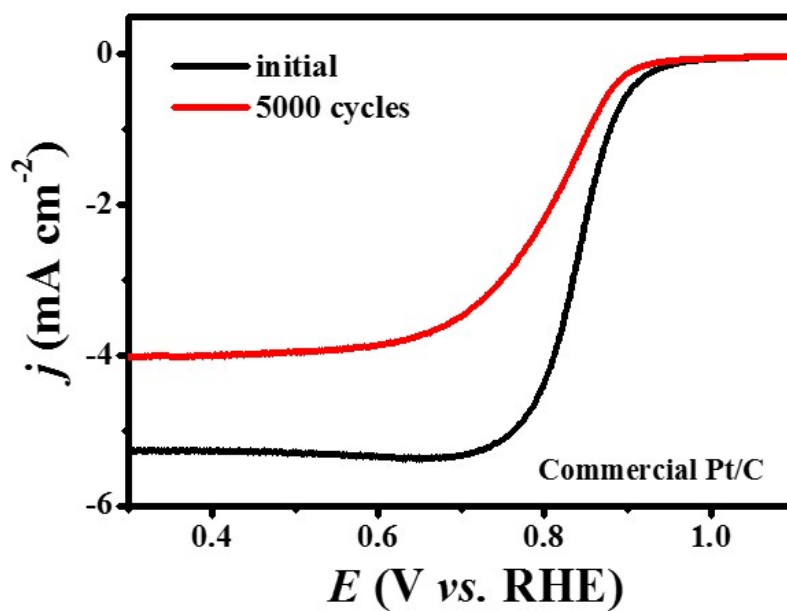

**Fig. S8** The ORR polarization curves before and after durability test for commercial Pt/C.
